# Supplementary material
Source: publisher site journal article supplement (https://www.spandidos-publications.com/1523/downloadSupplementary)

Figure S1. Transfection efficiency of nucleotides in A427 and A549 cells. RT-qPCR was used to analyze the expression levels of miR-192-5p in A427 and A549 cells transfected with (A) in-miR-192-5p or in-miR-NC and (B) miR-192-5p mimic or miR-NC. RT-qPCR and western blotting was used to determine the expression levels of c-Myc in A427 and A549 cells transfected with (C and D) pcDNA-c-Myc or pcDNA and (E and F) si-c-Myc or si-NC. \*P<0.05 vs. corresponding negative control cells (in-miR-NC, pcDNA or si-NC). RT-qPCR, reverse transcription-quantitative PCR; miR, microRNA; in, inhibitor; NC, negative control; si, small interfering RNA.

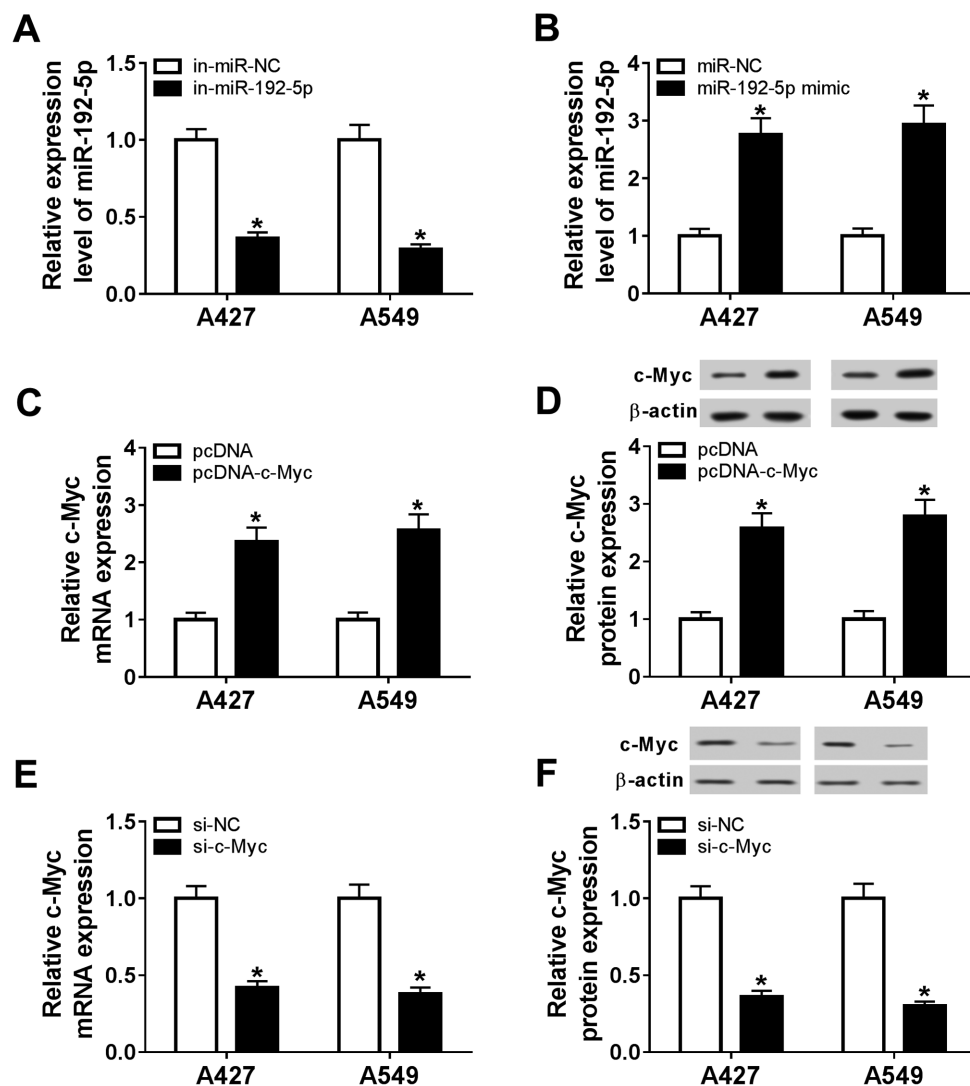

Figure S2. Effect of c-Myc overexpression on the curcumin/miR-192-5p axis in non-small-cell lung cancer progression. A427 and A549 cells were co-transfected with miR-192-5p mimic or miR-NC and pcDNA-c-Myc vector or pcDNA empty vector. (A) Expression levels of c-Myc were detected in cells using reverse transcription-quantitative PCR. (B) Cell proliferation in cells was determined using a Cell Counting Kit-8 assay. Rate of cellular (C) migration and (D) invasion was determined using a Transwell assay or Matrigel assay, respectively. \* $P < 0.05$ . miR, microRNA; NC, negative control.

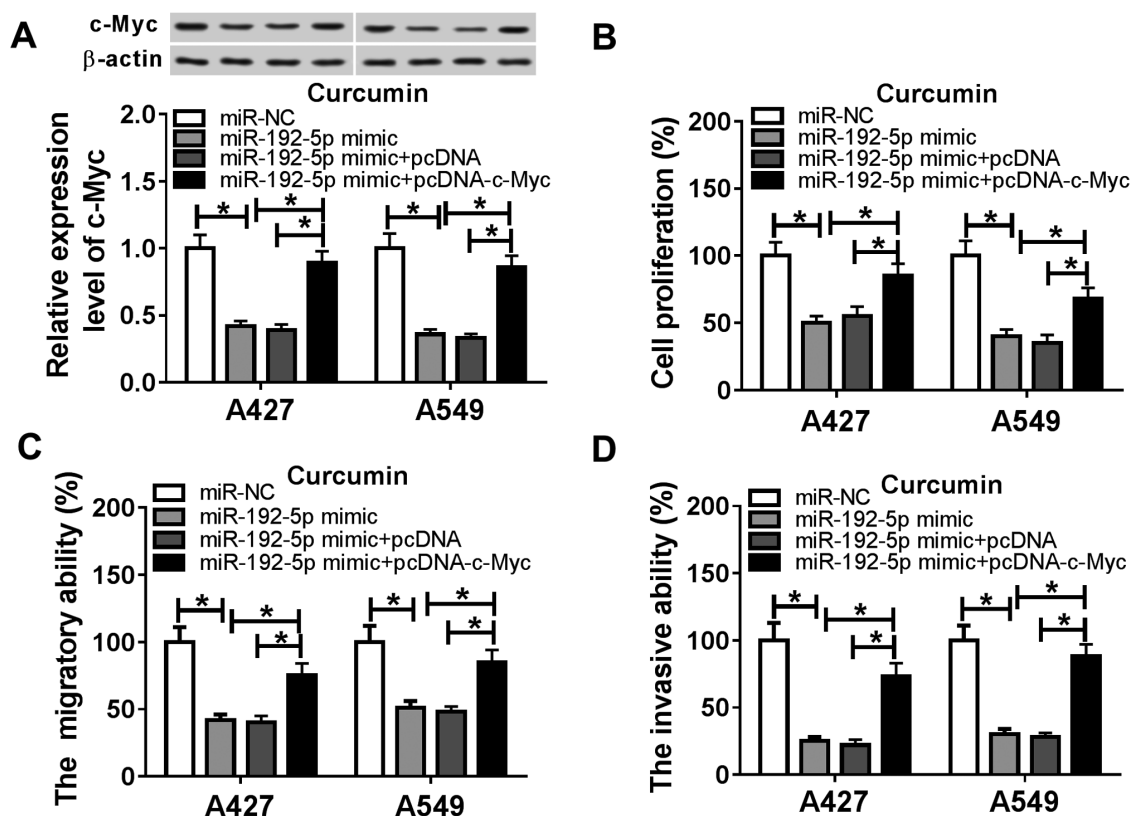

Supplement: Supplementary file 1 [file downloadSupplementary]
